# Supplementary material
Source: PubMed Central journal article supplement (PMC7573793)
Supplement: jamainternmed-e205664-s001.pdf [file jamainternmed-e205664-s001.pdf]

## Supplemental Online Content

White EM, Santostefano CM, Feifer RA, et al. Asymptomatic and presymptomatic severe acute respiratory syndrome coronavirus 2 infection rates in a multistate sample of skilled nursing facilities. *JAMA Intern Med*. Published online October 19, 2020. doi:10.1001/jamainternmed.2020.5664

### **eMethods.**

This supplemental material has been provided by the authors to give readers additional information about their work.

## Supplement

### eMethods

Signs and symptoms classified as potentially related to SARS-CoV-2 on nursing change in condition documentation:

- Fever (temperature 100.0F or higher)
- Hypoxia (oxygen saturation less than 92% or a 3% decline from baseline)
- Tachycardia (heart rate greater than 100)
- Cough
- Shortness of breath
- Chest congestion
- Nausea
- Vomiting
- Diarrhea
- Decreased oral intake
- Altered mental status
- Confusion
- Malaise
- Chills
- Anosmia
- Rhinorrhea
- Nasal congestion
- Sore throat
- Respiratory infection
- Respiratory arrest
